# Supplementary material for: “Whip from the hip”: thigh angular motion, ground contact mechanics, and running speed
Source: Oxford University Press journal article supplement (doi:10.1242/bio.053546), 2020-01-01

**SUPPLEMENTARY INFORMATION****Table S1. Subject descriptive characteristics, categorized by sex and athletic background.**

| Group Description                                | Age (years)       | Height (m)         | Leg Length (m)     | Mass (kg)         | BMI (kg m <sup>-2</sup> ) |
|--------------------------------------------------|-------------------|--------------------|--------------------|-------------------|---------------------------|
| <b>All Males</b><br>( <i>n</i> = 20)             | <b>21.6 ± 0.5</b> | <b>1.80 ± 0.01</b> | <b>0.94 ± 0.01</b> | <b>79.7 ± 3.0</b> | <b>24.6 ± 0.7</b>         |
| Male Track & Field Athletes<br>( <i>n</i> = 9)   | 21.6 ± 0.8        | 1.78 ± 0.01        | 0.93 ± 0.01        | 73.4 ± 2.0        | 23.1 ± 0.5                |
| Male Team Sport Athletes<br>( <i>n</i> = 5)      | 20.2 ± 0.4        | 1.83 ± 0.03        | 0.97 ± 0.03        | 87.0 ± 8.6        | 25.9 ± 1.7                |
| Male Recreationally Trained<br>( <i>n</i> = 6)   | 22.7 ± 1.2        | 1.79 ± 0.03        | 0.92 ± 0.02        | 82.9 ± 5.7        | 25.7 ± 1.4                |
|                                                  |                   |                    |                    |                   |                           |
| <b>All Females</b><br>( <i>n</i> = 20)           | <b>21.7 ± 0.4</b> | <b>1.67 ± 0.02</b> | <b>0.89 ± 0.01</b> | <b>59.0 ± 1.4</b> | <b>21.1 ± 0.5</b>         |
| Female Track & Field Athletes<br>( <i>n</i> = 6) | 23.0 ± 1.0        | 1.72 ± 0.02        | 0.91 ± 0.01        | 60.6 ± 2.0        | 20.4 ± 0.4                |
| Female Team Sport Athletes<br>( <i>n</i> = 8)    | 21.0 ± 0.3        | 1.62 ± 0.03        | 0.88 ± 0.02        | 58.4 ± 2.9        | 22.2 ± 0.6                |
| Female Recreationally Trained<br>( <i>n</i> = 6) | 21.3 ± 0.3        | 1.70 ± 0.03        | 0.90 ± 0.02        | 58.2 ± 2.2        | 20.2 ± 1.1                |

All values are group means ± standard error of the mean (s.e.m.).

**Table S2. Additional thigh angular kinematic variables across speeds, with trials categorized by percentage top speed.**

|                            | Slow<br><75% Top Speed<br>(n = 44 trials) | Intermediate<br>75-93% Top Speed<br>(n = 48 trials) | Fast<br>>93% Top Speed<br>(n = 62 trials) |
|----------------------------|-------------------------------------------|-----------------------------------------------------|-------------------------------------------|
| $\theta_{td}$ (rad, deg)   | 0.49 ± 0.01<br>27.9 ± 0.6                 | 0.55 ± 0.01†<br>31.7 ± 0.7                          | 0.61 ± 0.01*†<br>35.0 ± 0.6               |
| $\theta_{to}$ (rad, deg)   | 0.36 ± 0.02<br>20.7 ± 1.0                 | 0.43 ± 0.02†<br>24.5 ± 1.0                          | 0.44 ± 0.01†<br>25.3 ± 0.7                |
| $\theta_{ext}$ (rad, deg)  | 0.41 ± 0.02<br>23.8 ± 1.2                 | 0.51 ± 0.02†<br>29.2 ± 1.0                          | 0.55 ± 0.01†<br>31.7 ± 0.8                |
| $\theta_{flex}$ (rad, deg) | 0.78 ± 0.03<br>44.9 ± 1.9                 | 0.98 ± 0.03†<br>56.2 ± 1.6                          | 1.09 ± 0.03*†<br>62.5 ± 1.5               |

All angular variables are absolute values. Values are means ± standard error of the mean (s.e.m.).

Thigh angular variables: thigh angular position at touchdown ( $\theta_{td}$ ), thigh angular position at takeoff ( $\theta_{to}$ ), peak thigh extension during flight ( $\theta_{ext}$ ), and peak thigh flexion during flight ( $\theta_{flex}$ ).

† indicates significantly different than Slow speed ( $p < 0.05$ )

\* indicates significantly different than Intermediate speed ( $p < 0.05$ )

**Table S3. Additional thigh angular kinematic variables across top speed trials, with subjects categorized based on sex and top speed.**

|                            | Fast Males<br>(n = 10)    | Slow Males<br>(n = 10)    |  | Fast Females<br>(n = 10)  | Slow Females<br>(n = 10)  |
|----------------------------|---------------------------|---------------------------|--|---------------------------|---------------------------|
| $\theta_{td}$ (rad, deg)   | 0.62 ± 0.02<br>35.4 ± 1.2 | 0.62 ± 0.02<br>35.4 ± 1.3 |  | 0.59 ± 0.04<br>34.0 ± 2.0 | 0.59 ± 0.01<br>34.0 ± 0.7 |
| $\theta_{to}$ (rad, deg)   | 0.40 ± 0.03<br>23.2 ± 1.6 | 0.47 ± 0.03<br>27.2 ± 1.6 |  | 0.47 ± 0.03<br>26.7 ± 1.7 | 0.50 ± 0.02<br>28.7 ± 1.4 |
| $\theta_{ext}$ (rad, deg)  | 0.50 ± 0.03<br>28.6 ± 1.9 | 0.59 ± 0.04<br>33.8 ± 2.5 |  | 0.59 ± 0.03<br>33.7 ± 1.7 | 0.62 ± 0.03<br>35.5 ± 1.9 |
| $\theta_{flex}$ (rad, deg) | 1.23 ± 0.07<br>70.3 ± 3.8 | 1.04 ± 0.07<br>59.6 ± 3.8 |  | 1.06 ± 0.06<br>60.6 ± 3.6 | 0.93 ± 0.01<br>53.2 ± 0.7 |

All angular variables are absolute values. Values are means ± standard error of the mean (s.e.m.).

Thigh angular variables: thigh angular position at touchdown ( $\theta_{td}$ ), thigh angular position at takeoff ( $\theta_{to}$ ), peak thigh extension during flight ( $\theta_{ext}$ ), and peak thigh flexion during flight ( $\theta_{flex}$ ).

† indicates significantly different ( $p < 0.05$ ), Faster Males vs. Slower Males

\* indicates significantly different ( $p < 0.05$ ), Faster Females vs. Slower Females

**Fig. S1. Evaluation of the motion capture method for determining running speed.** Running speed in the 31 to 39 m field of view ( $n = 154$ ) measured by the radar gun is compared to speed determined by the motion capture method, with dashed Line of Identify ( $x = y$ ).

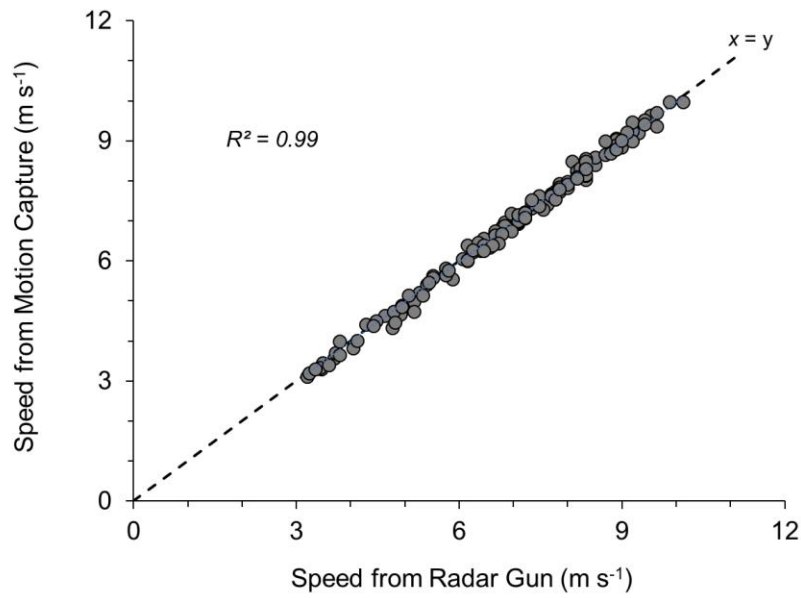

**Fig. S2. Evaluation of the motion capture method for determining ground contact time ( $T_c$ ).**

For the sub-set of trials ( $n = 95$ ) used to complete this validation,  $T_c$  measured by the force plate is plotted compared to  $T_c$  determined by the motion capture method, with dashed Line of Identify ( $x = y$ ).

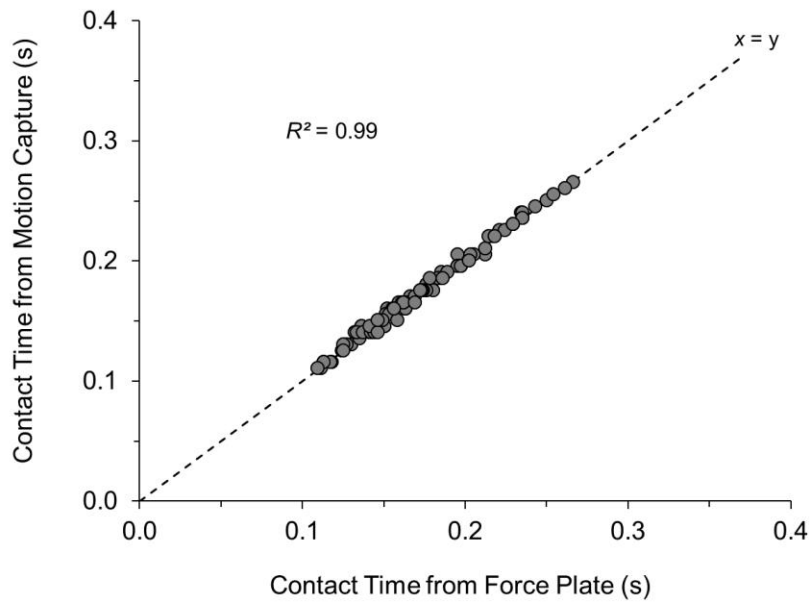

Supplement: bio053546supp.pdf [file bio053546supp.pdf]
